# Supplementary material for: LPS‐Treated Podocytes Polarize Naive CD4+ T Cells into Th17 and Treg Cells
Source: Hindawi journal article supplement (doi:10.1155/2020/8587923), 2020-01-01
Supplement: f1 [file 8587923.f1.pdf]

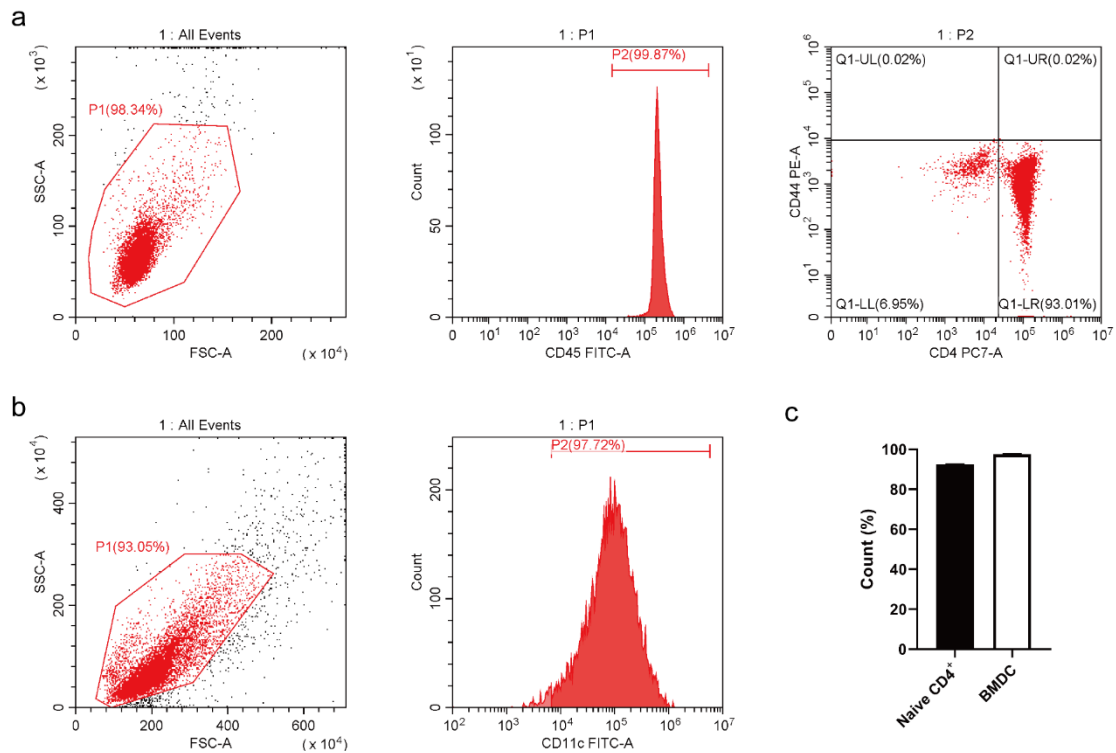

Figure S1 The identification of naive CD4<sup>+</sup> T cells and BMDCs.

Naive CD4<sup>+</sup> T cells were obtained from C57BL/6 mouse spleens by magnetic cell sorting. BMDCs were induced from bone marrow mononucleocytes of C57BL/6 mice. Flow cytometry was performed for cell identification. (a) The expression of CD45, CD4, and CD44 in obtained naive CD4<sup>+</sup> T cells were calculated. (b) The expression of CD11c in induced BMDCs was calculated. (c) The expression levels of CD4<sup>+</sup>CD45<sup>+</sup>CD44<sup>-</sup> naive CD4<sup>+</sup> T cells and CD11c<sup>+</sup> BMDCs were calculated. (Data are shown as mean ± SEM. BMDC, bone marrow-derived dendritic cell.)
